# Supplementary material for: Combined Inhibition of Indolamine-2,3-Dioxygenase 1 and C-X-C Chemokine Receptor Type 2 Exerts Antitumor Effects in a Preclinical Model of Cervical Cancer
Source: MDPI journal article supplement (doi:10.3390/biomedicines11082280), 2023-08-16
Supplement: s1 [file s1]

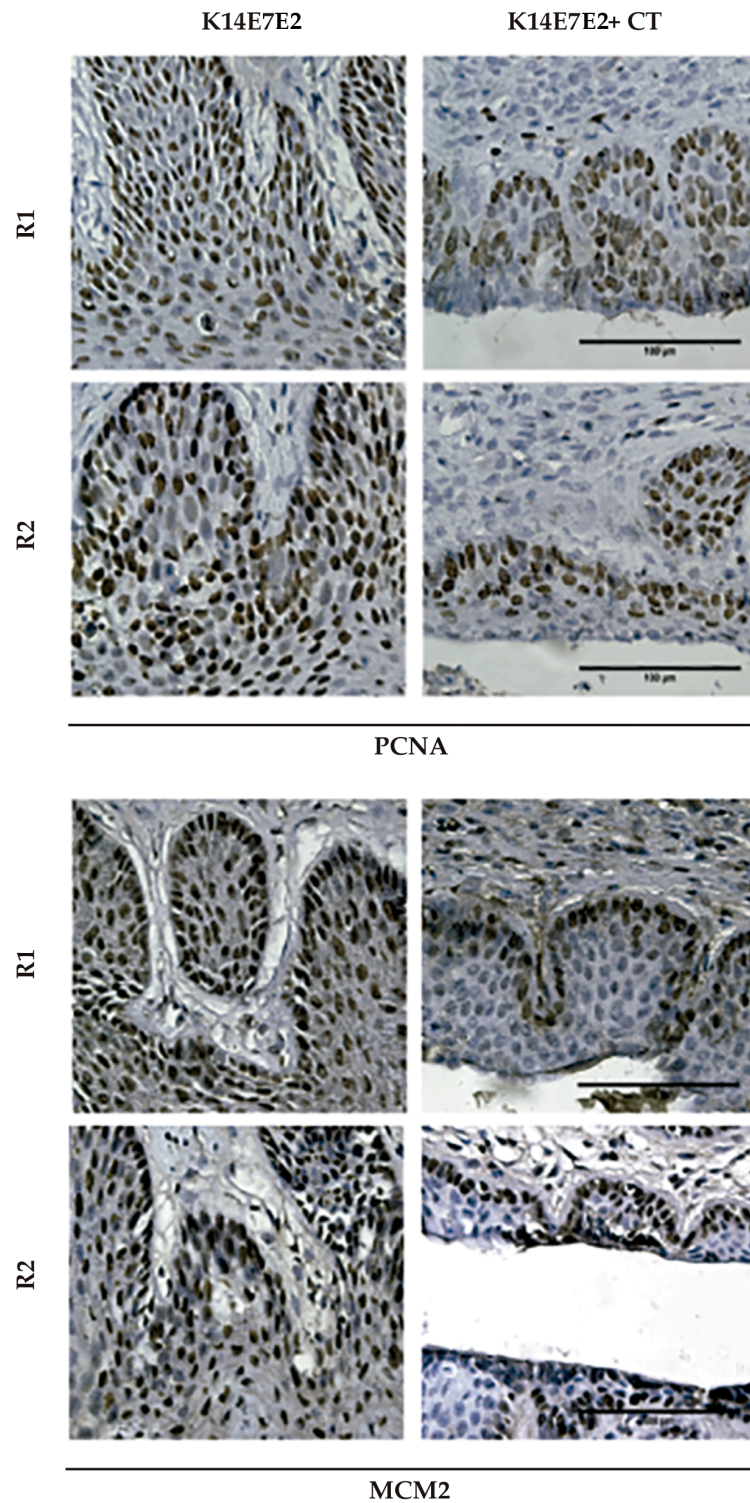

Figure S2. The immunodetection pattern of PCNA A) and MCM2 B) shows a decrease in proliferation when combined therapy is administered (panel K14E7E2 + CT). The visual field at 40x magnification and scale bar 200  $\mu\text{m}$ .
